# Supplementary material
Source: PubMed Central journal article supplement (PMC6214620)
Supplement: NIHMS988168-supplement-Supporting_information.pdf [file NIHMS988168-supplement-Supporting_information.pdf]

# Histidine–Lysine Axial Ligand Switching in a Hemoglobin: A Role for Heme Propionates

Dillon B. Nye<sup>†</sup>, Matthew R. Preimesberger<sup>†||</sup>, Ananya Majumdar<sup>‡</sup>, and Juliette T. J. Lecomte<sup>†\*</sup>

<sup>†</sup> T.C. Jenkins Department of Biophysics, Johns Hopkins University, Baltimore, MD 21218, United States

<sup>‡</sup> Biomolecular NMR Center, Johns Hopkins University, Baltimore, Maryland, 21218, United States

<sup>||</sup> Current address: Cellmig Biolabs Inc., Cambridge, MA 02142, United States

## Supporting Information

- Figure S1: Heme structure, nomenclature, and modification
- Figure S2: Overlay of electronic absorption spectra of Fe(II) PP GlnN-A at pH 7.2 and 10.5
- Figure S3: Overlay of electronic absorption spectra of PP and PPDME GlnN at neutral pH
- Figure S4: Comparison of 1D <sup>1</sup>H NMR spectra of Fe(III) PP GlnN and PPDME GlnN
- Figure S5: Example amide <sup>1</sup>H-<sup>15</sup>N chemical shift changes in Fe(III) PPDME GlnN compared to PP GlnN
- Figure S6: Example amide <sup>1</sup>H-<sup>15</sup>N chemical shift changes in Fe(II) PPDME GlnN-A compared to PP GlnN-A
- Figure S7: Electronic absorption spectra of Fe(III) PPDME GlnN as a function of pH
- Figure S8: Upfield regions of the 1D <sup>1</sup>H NMR and <sup>1</sup>H-<sup>15</sup>N HSQC spectra of Fe(II) PPDME GlnN-A showing the axial lysine NζH<sub>2</sub> group
- Figure S9: Location of the lysines in the three-dimensional structure of *bis*-histidine GlnN-A
- Figure S10: 1D <sup>1</sup>H NMR and electronic absorption spectra of Fe(II) PPDME K42L GlnN-A at alkaline pH

- Figure S11: Upfield regions of the 1D  $^1\text{H}$  NMR spectrum of Fe(II) PPDME GlnN-A at pH 9.3 and pH 10.5
- Figure S12: NMR spectra of Fe(II) PPDME GlnN-A at pH 9.5 at high pressure
- Figure S13: Exchange build-up curves for Lys42 signals in the  $^1\text{H}$ - $^1\text{H}$  EXSY experiment used for exchange rate constant determination in Fe(II) PPDME GlnN-A
- Figure S14: Aromatic portion of the DQF-COSY spectrum of Fe(II) PPDME GlnN-A
- Figure S15: Overlay of a portion of the  $^1\text{H}$ - $^{15}\text{N}$  HSQC and  $^1\text{H}$ - $\text{N}_z$ - $^{15}\text{N}$  ZZ exchange spectra of Fe(II) PPDME GlnN-A at alkaline pH
- Figure S16: Annotated  $^1\text{H}$ - $\text{N}_z$ - $^1\text{H}$  ZZ exchange spectrum and CSP plot of Fe(II) PPDME GlnN-A at alkaline pH
- Figure S17: Electronic absorption spectra showing the formation of the heme–His117 linkage in PP GlnN, PP K42L GlnN, PPDME GlnN, and PPDME K42L GlnN
- Figure S18: Kinetics of formation of the heme–His117 linkage analyzed by singular value decomposition
- Figure S19: 1D  $^1\text{H}$  NMR and electronic absorbance spectra of Fe(II) PP H46L GlnN-A
- Table S1: Heme and select side chain assignments for Fe(III) PPDME GlnN at pH 7.2, comparison to Fe(III) PP GlnN
- Table S2: Heme and select side chain assignments for His–Fe–His and His–Fe–Lys conformations of Fe(II) PPDME GlnN-A at pH 9.6
- Table S3: Sequence statistics for relatives of GlnN

Derivation of the pKa equation.

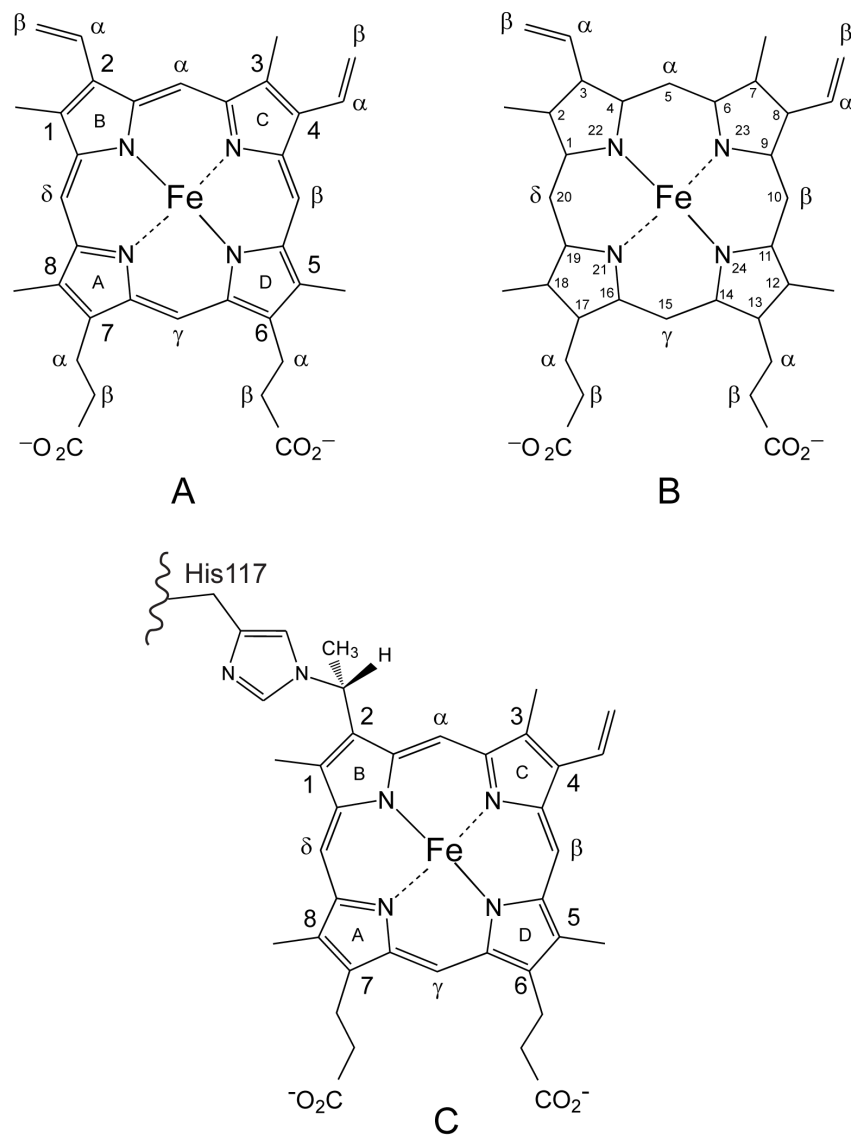

**Figure S1:** Heme nomenclature. **(A)** Fischer numbering used in the text. **(B)** IUPAC numbering; double bonds have been removed for clarity. The propionates on pyrroles A and D are methyl-esterified in PPDME. **(C)** The heme group after the post-translational modification.

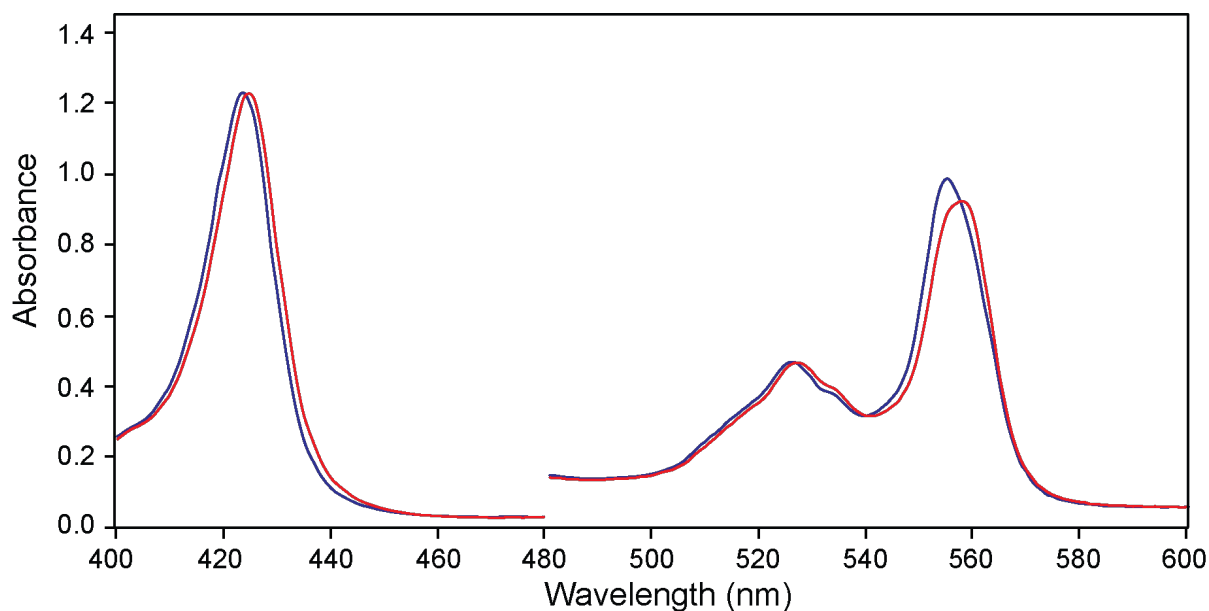

**Figure S2:** Electronic absorption spectra of Fe(II) PP Gln-A at neutral pH (9  $\mu$ M, 100 mM potassium phosphate, pH 7.2, red) and alkaline pH (9  $\mu$ M, 100 mM sodium (bi)carbonate buffer, pH 10.5, blue). The spectra were acquired 2 min after treatment of the Fe(III) PP Gln-A form with dithionite. The visible region has been scaled 5-fold to highlight the spectral changes at alkaline pH.

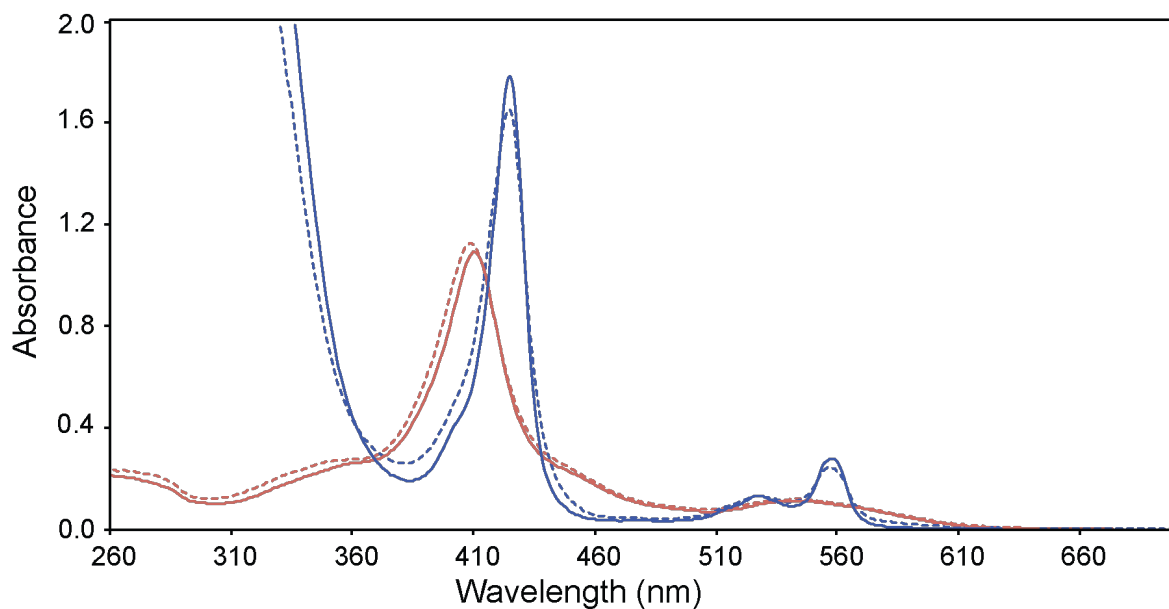

**Figure S3.** Electronic absorption spectra of Gln at neutral pH (11  $\mu$ M, 100 mM potassium phosphate, pH 7.2). Fe(III) PPDME Gln (dashed red trace) was treated with dithionite and incubated for 2 min, resulting in the formation of Fe(II) PPDME Gln-A (dashed blue trace). Also shown are the spectra of Fe(III) PP Gln (solid red trace) and Fe(II) PP Gln-A (solid blue trace).

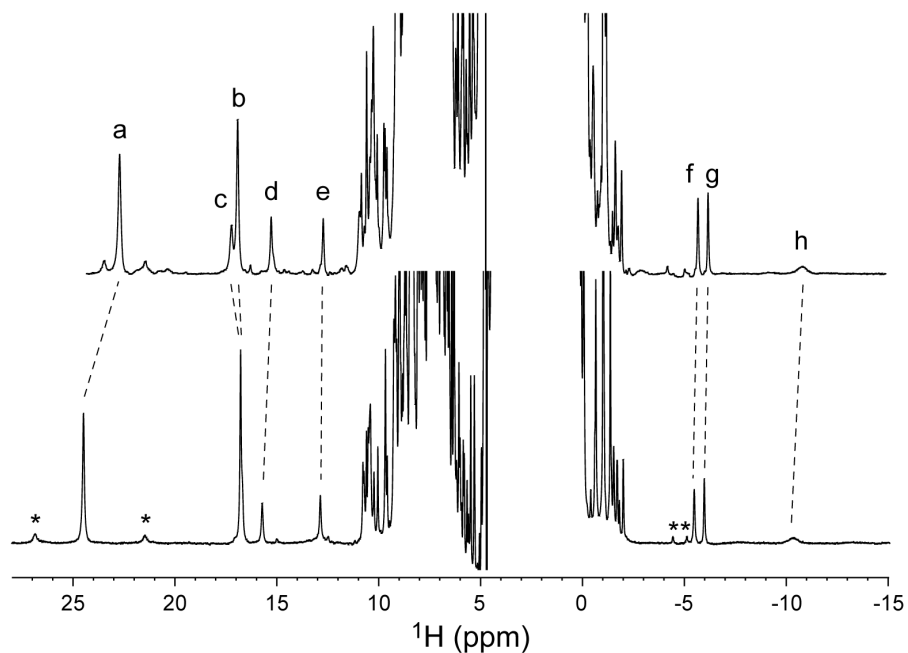

**Figure S4.** Comparison of the 1D <sup>1</sup>H NMR spectra of Fe(III) PPDME GlnN (top, 1.1 mM GlnN, 25 mM potassium phosphate, pH 7.2, 10% <sup>2</sup>H<sub>2</sub>O, 25 °C) and Fe(III) PP GlnN (bottom, 20 mM potassium phosphate, pH 6.9). Dashed lines join signals arising from the same group in each complex. Assignments in Fe(III) PPDME GlnN were derived from those in Fe(III) PP GlnN<sup>1</sup> and confirmed with standard 2D <sup>1</sup>H-<sup>1</sup>H experiments (see text). The resolved, annotated peaks are: a, heme 5-CH<sub>3</sub>; b, heme 1-CH<sub>3</sub>; c, heme 2-vinyl H<sub>α</sub>; d, His70 H<sub>δ1</sub>; e, His46 H<sub>δ1</sub>; f, heme 2-vinyl H<sub>β</sub><sub>cis</sub>; g, heme 2-vinyl H<sub>β</sub><sub>trans</sub>; h, axial histidine imidazole H<sub>ε1</sub> (or H<sub>δ2</sub>). Small peaks such as those marked by asterisks are due to a small population of holoprotein with the heme flipped with respect to the  $\alpha,\gamma$  meso axis.

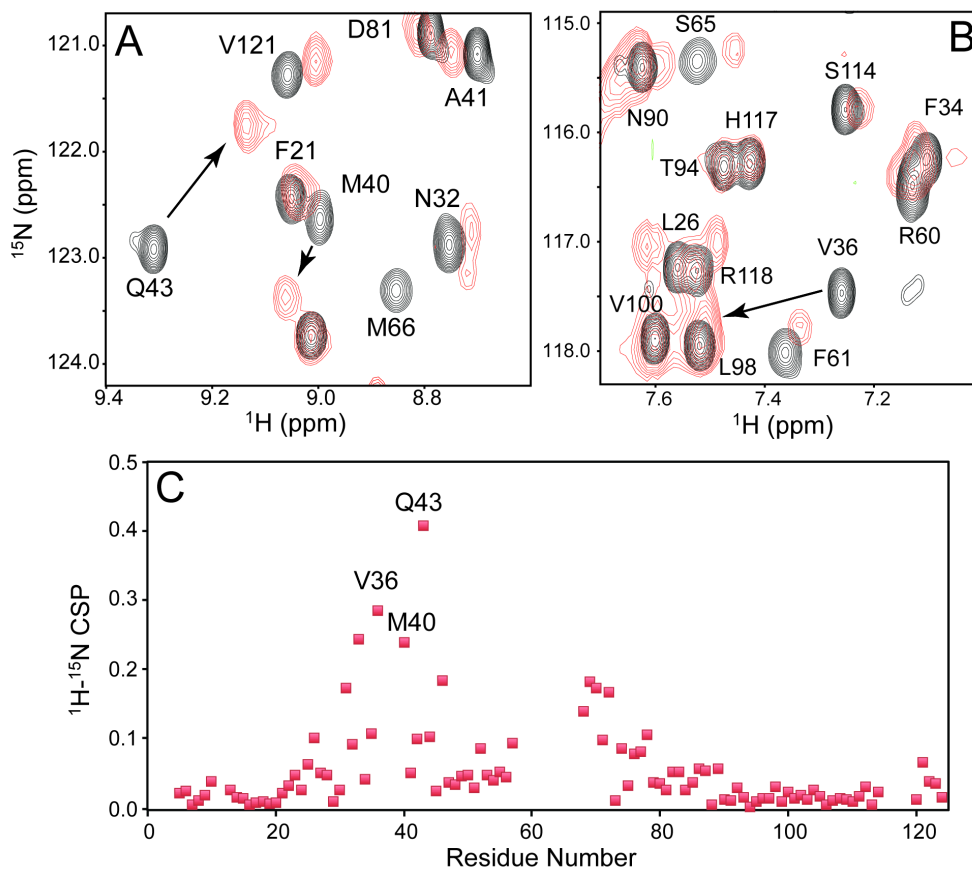

**Figure S5.** Comparison of amide chemical shifts of Fe(III) PPDME Gln and Fe(III) PP Gln at neutral pH. (A) and (B) show portions of the  $^1\text{H}$ - $^{15}\text{N}$  HSQC spectra of PP Gln $^2$  (black, pH 7.3) and PPDME Gln (red, 0.4 mM Gln, 95 mM potassium phosphate, pH 7.0, 5%  $^2\text{H}_2\text{O}$ , 25  $^\circ\text{C}$ ) emphasizing the CSPs for Val36, Met40, and Gln43. Marked assignments correspond to the Gln (black) spectrum. (C) Plot of CSP vs. residue number for the assigned resonances of PPDME Gln (103 of the 122 non-proline residues). The CSP is calculated from the difference in  $^1\text{H}$  and  $^{15}\text{N}$  chemical shift in PPDME Gln compared to PP Gln (see Materials and Methods). Significant changes are observed in the E and F helices, which provide the distal and proximal heme ligands, respectively. Resonances arising from the EF loop (residues 57–67) could not be confidently assigned in PPDME Gln. The N-terminal portion of the E helix (residues 40–46) and the C helix (residues 31–36) show the greatest changes in chemical shift. Select heme and side chain assignments are given in Table S1.

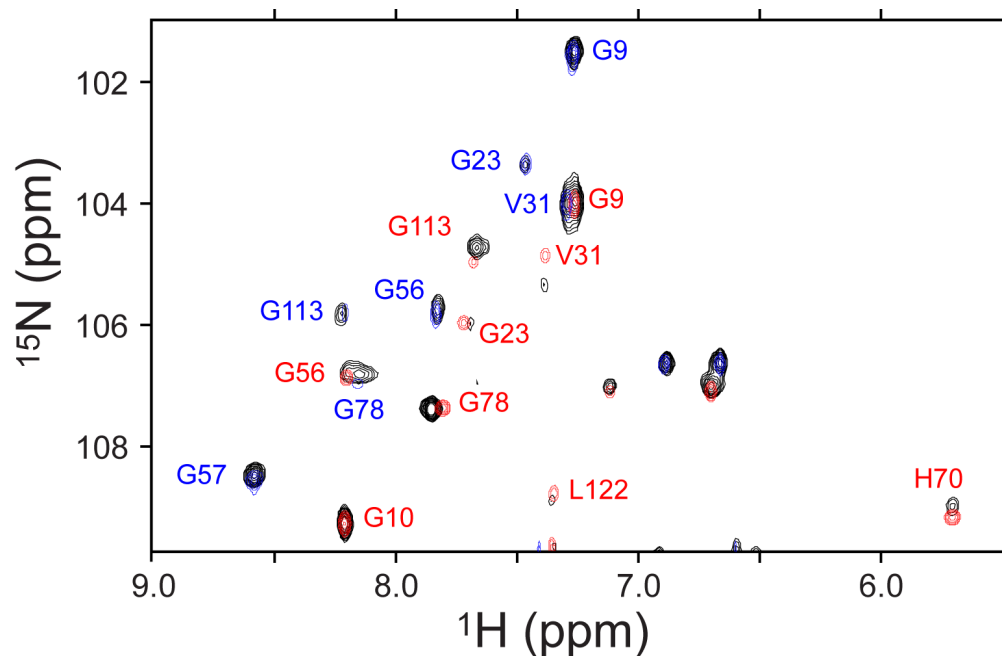

**Figure S6.** Comparison of the upfield ( $^{15}\text{N}$ ) region of the  $^1\text{H}$ - $^{15}\text{N}$  HSQC spectrum of Fe(II) PPDME Gln-A (black, 0.4 mM Gln, 100 mM potassium phosphate buffer pH 7.2, 10%  $^2\text{H}_2\text{O}$ , 25  $^\circ\text{C}$ ) with the spectrum of Fe(II) PP Gln-A (red, pH 7.2) and the Gln apoprotein (blue, pH 7.4). The published assignments for Fe(II) PP Gln-A<sup>2</sup> and the apoprotein<sup>3</sup> are given in red and blue, respectively. The spectrum of Fe(II) PPDME Gln-A is essentially a superposition of the spectra of Fe(II) PP Gln-A and the apoprotein. This particular sample had a high level of residual apoprotein.



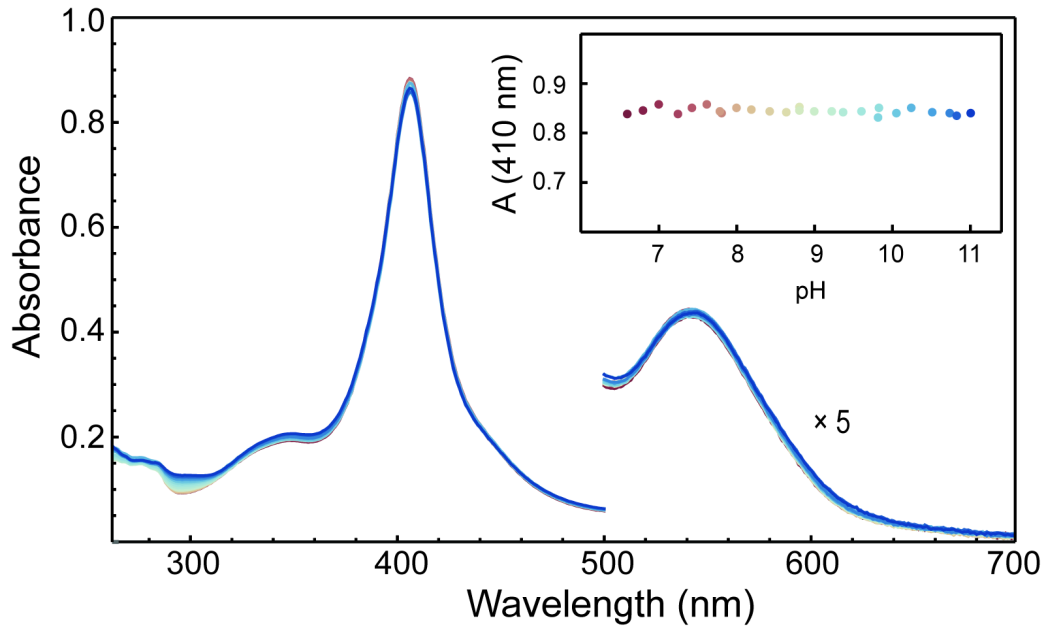

**Figure S7.** pH titration of Fe(III) PPDME G1bN-A monitored by electronic absorption spectroscopy. Each trace corresponds to an individual sample of ferric protein. The inset shows the pH dependence of the absorbance at 410 nm (the Soret peak maximum). The Q bands (500–700 nm, absorbance values multiplied by five) also change minimally over the pH range 6.6 to 11.2. The most significant pH-dependent changes are observed in the near-UV region of the spectrum and attributed to tyrosinate formation at alkaline pH. The data contain random error resulting from dilution correction.

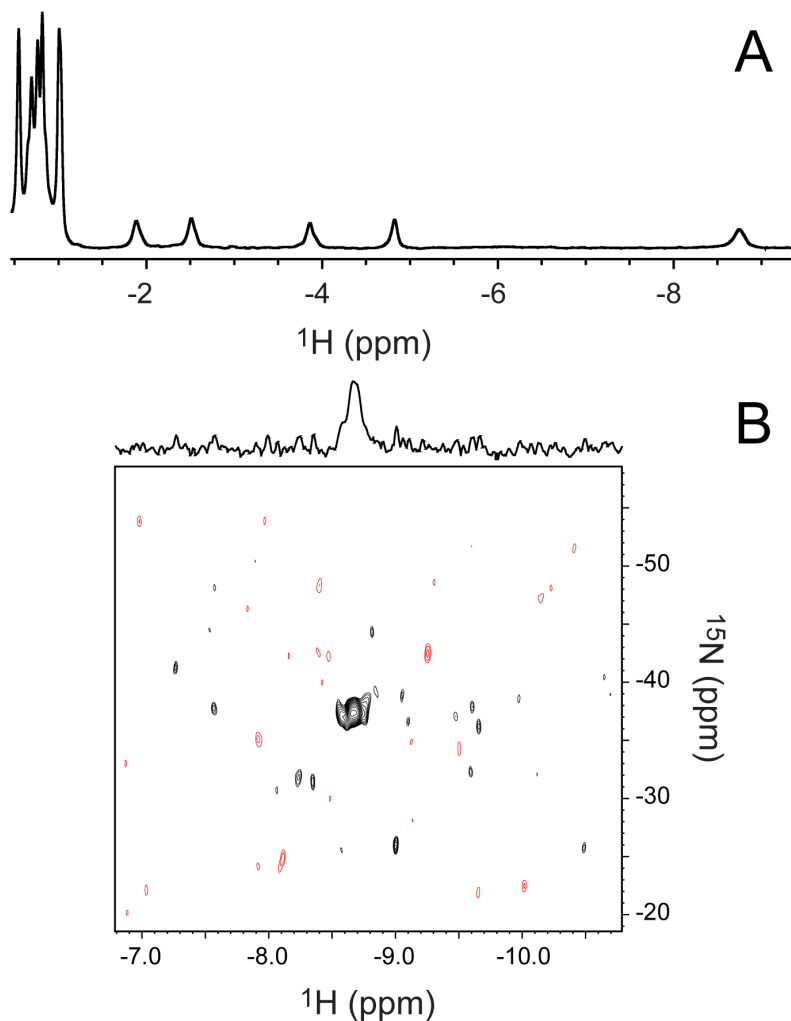

**Figure S8.** (A) The upfield portion of the 1D  $^1\text{H}$  spectrum of Fe(II) PPDME GlnN-A in  $\text{H}_2\text{O}$  (~1.5 mM GlnN-A, 95 mM sodium borate buffer pH 9.7, 5%  $^2\text{H}_2\text{O}$ , 25  $^\circ\text{C}$ ) acquired using a flipback-WATERGATE solvent suppression scheme. The far upfield peak at -8.7 ppm exchanges with solvent and is attenuated when the water signal is saturated. (B) The tailored  $^1\text{H}$ - $^{15}\text{N}$  HSQC spectrum of uniformly  $^{15}\text{N}$  labeled Fe(II) PPDME GlnN-A (~700  $\mu\text{M}$  GlnN, 250 mM sodium borate buffer pH 9.2, 10%  $^2\text{H}_2\text{O}$ , 25  $^\circ\text{C}$ ). The  $^{15}\text{N}$  carrier frequency was -35 ppm and the transfer delays were set to 3.2 ms ( $1/4 J$  for  $J \sim 65$  Hz as expected for a lysine  $\text{NH}_2$  group). Allowing the  $^1\text{H}$ - $^{15}\text{N}$  coupling to evolve during  $^{15}\text{N}$  frequency labeling returned a triplet and confirmed that the  $^{15}\text{N}$  nucleus belongs to an  $\text{NH}_2$  spin system (data not shown).

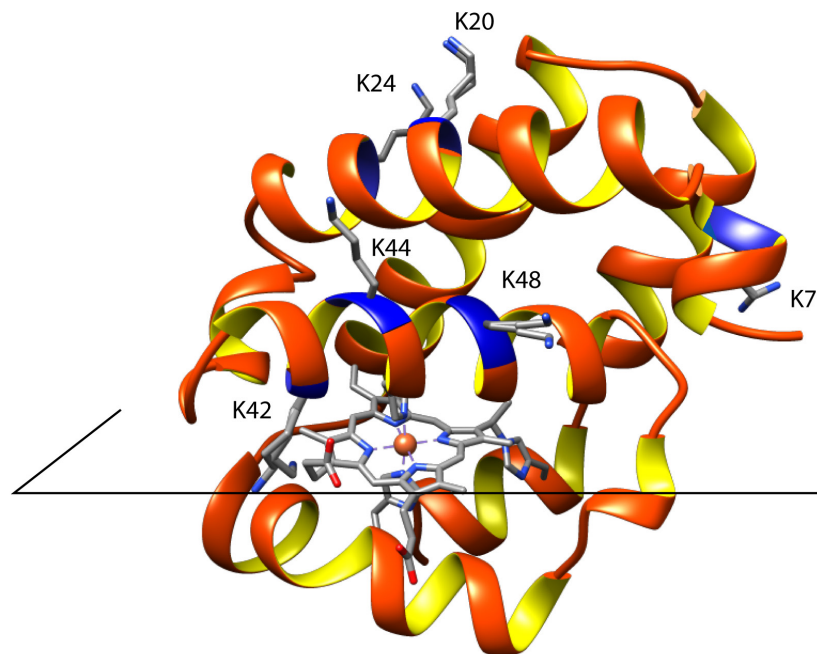

**Figure S9.** Location of the lysine residues in the structure of GlnN-A (PDB ID 4MAX). The outline represents the plane of the heme and divides the structure in a proximal half (below plane) and distal half (above the plane). K7, K20, K42, and K48 have more than one conformation in the crystal.

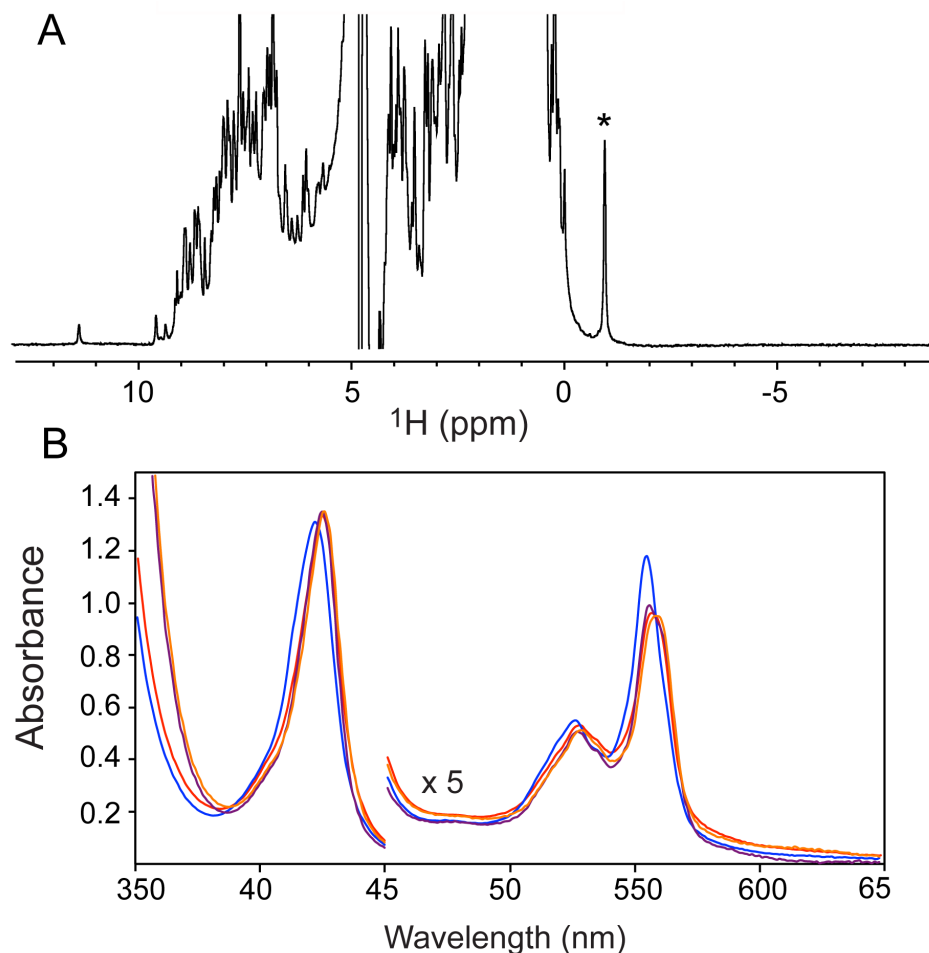

**Figure S10.** (A) The 1D  $^1\text{H}$  NMR spectrum of Fe(II) PPDME K42L GlnN-A ( $\sim 250 \mu\text{M}$  GlnN-A, 90 mM sodium borate buffer pH 9.2, 10%  $^2\text{H}_2\text{O}$ , 25  $^\circ\text{C}$ ) acquired using water presaturation. Note the complete absence of upfield peaks corresponding to a lysine heme ligand (see Figure 4 and Figure S8). The large peak at  $-1$  ppm denoted with an asterisk corresponds to the overlapping  $\text{CH}_3$  groups of Val121 (see Figure 4). (B) The electronic absorption spectra of Fe(II) PPDME K42L GlnN-A at pH 7.0 (orange,  $\sim 4 \mu\text{M}$  GlnN-A, 100 mM potassium phosphate buffer) and pH 9.2 (purple,  $\sim 4 \mu\text{M}$  GlnN-A, 100 mM sodium borate buffer). For comparison the spectra of Fe(II) PPDME GlnN-A at pH 7.0 (red) and pH 9.2 (blue) are reproduced from Figure 3. The K42L GlnN-A spectra were linearly scaled according to the ferric Soret absorbance (2.3 fold) for ease of comparison. Note that the spectrum of PPDME K42L GlnN-A changes minimally over this pH range.

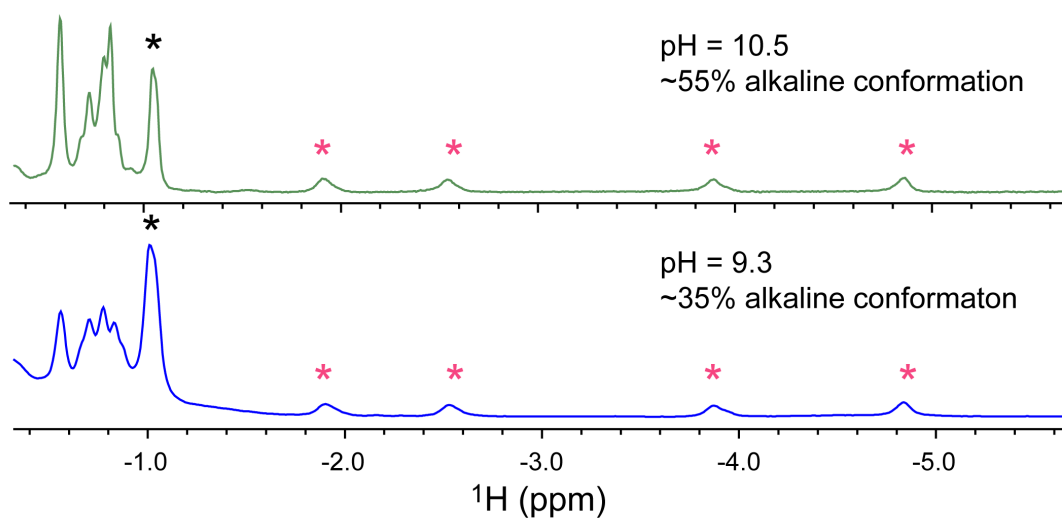

**Figure S11.**  $^1\text{H}$  1D NMR spectra of Fe(II) PPDME GlnN-A at pH 10.5 (0.5 mM GlnN-A, 90 mM sodium (bi)carbonate buffer, top, green) and pH 9.3 (1.3 mM GlnN-A, 90 mM sodium borate buffer, bottom, blue). The black asterisks denote the overlapping  $\text{CH}_3$  signals of Val121 in the native His–Fe–His conformation; the red asterisks denote the  $\text{H}_\epsilon$ ,  $\text{H}_\epsilon'$ ,  $\text{H}_\delta$  and  $\text{H}_\delta'$  signals of the axial lysine in the His–Fe–Lys conformation. Deconvolution of the region between  $-0.2$  and  $-6.0$  ppm was performed with TopSpin to obtain population estimates.

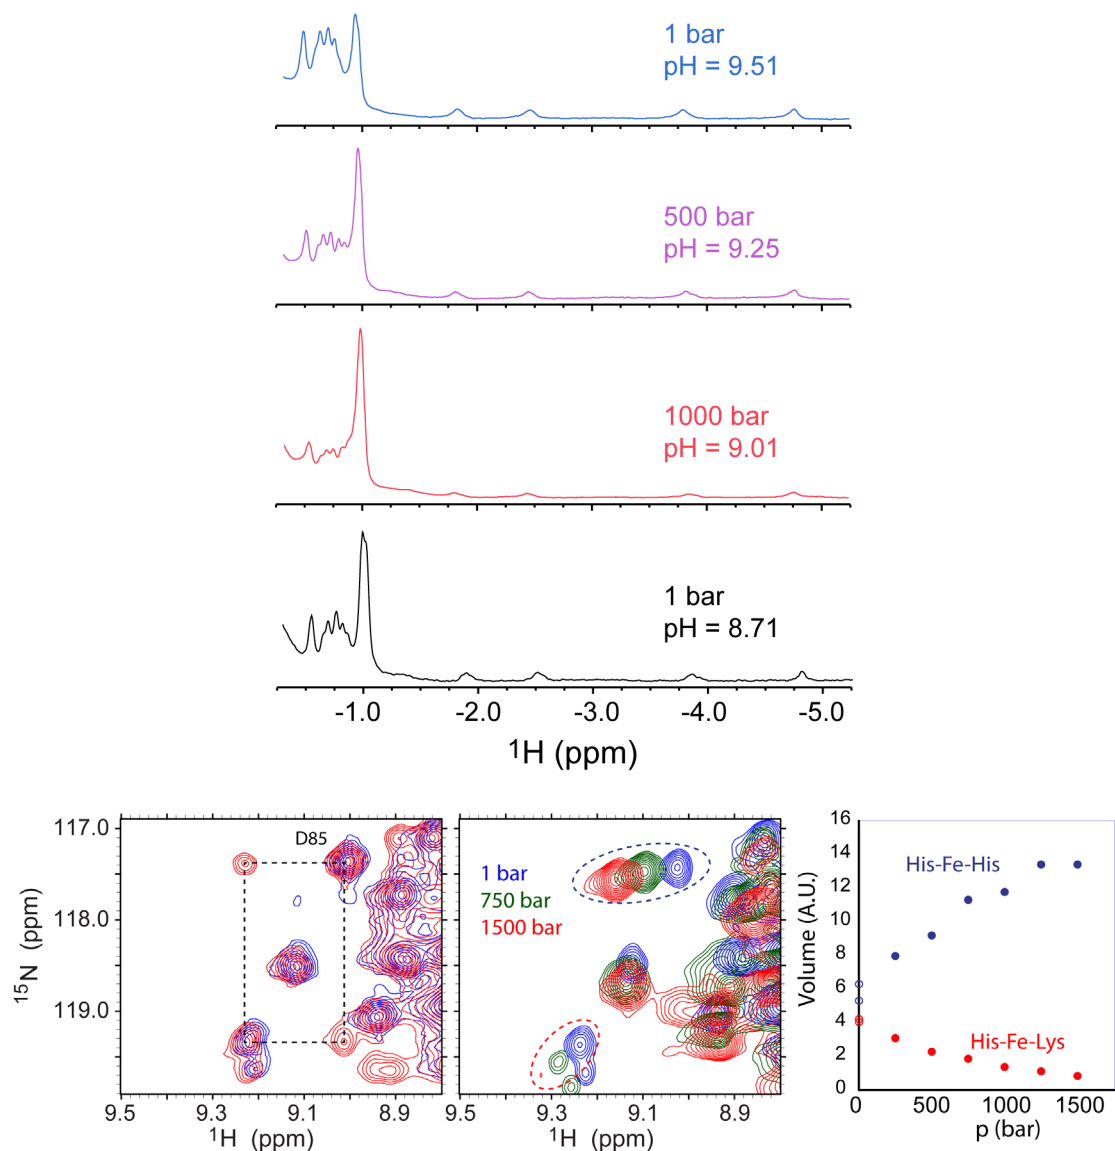

**Figure S12.** The response of Fe(II) PPDME GlnN-A (1 mM GlnN-A, 90 mM sodium borate buffer pH 9.51 at 1 bar, 25 °C) to hydrostatic pressure. Top: The  $^1\text{H}$  NMR spectra acquired at 1 bar (blue, pH 9.51), 500 bar (purple, pH 9.25) and 1000 bar (red, pH 9.01) are shown. The solution pH at high pressure is calculated from the known pressure dependence of the ionization of boric acid.<sup>4</sup> The spectral changes induced by pressure were found to be fully reversible. The spectrum of Fe(II) PPDME GlnN-A (black, 0.2 mM GlnN-A, 90 mM sodium borate buffer pH 8.71, 10%  $^2\text{H}_2\text{O}$ , 1 bar, 25 °C) is shown for comparison. Note the weakening of the peaks attributed to the axial Lys42 while the signals from the His–Fe–His species increase. Bottom: Left, identification of D85 amide cross peak in the His–Fe–Lys state via  $^1\text{H}$ - $^{15}\text{N}$ - $^{15}\text{N}$  ZZ exchange data; Center, pressure response of the  $^1\text{H}$ - $^{15}\text{N}$  HSQC spectrum; Right: disappearance of the His–Fe–Lys state as pressure is increased.

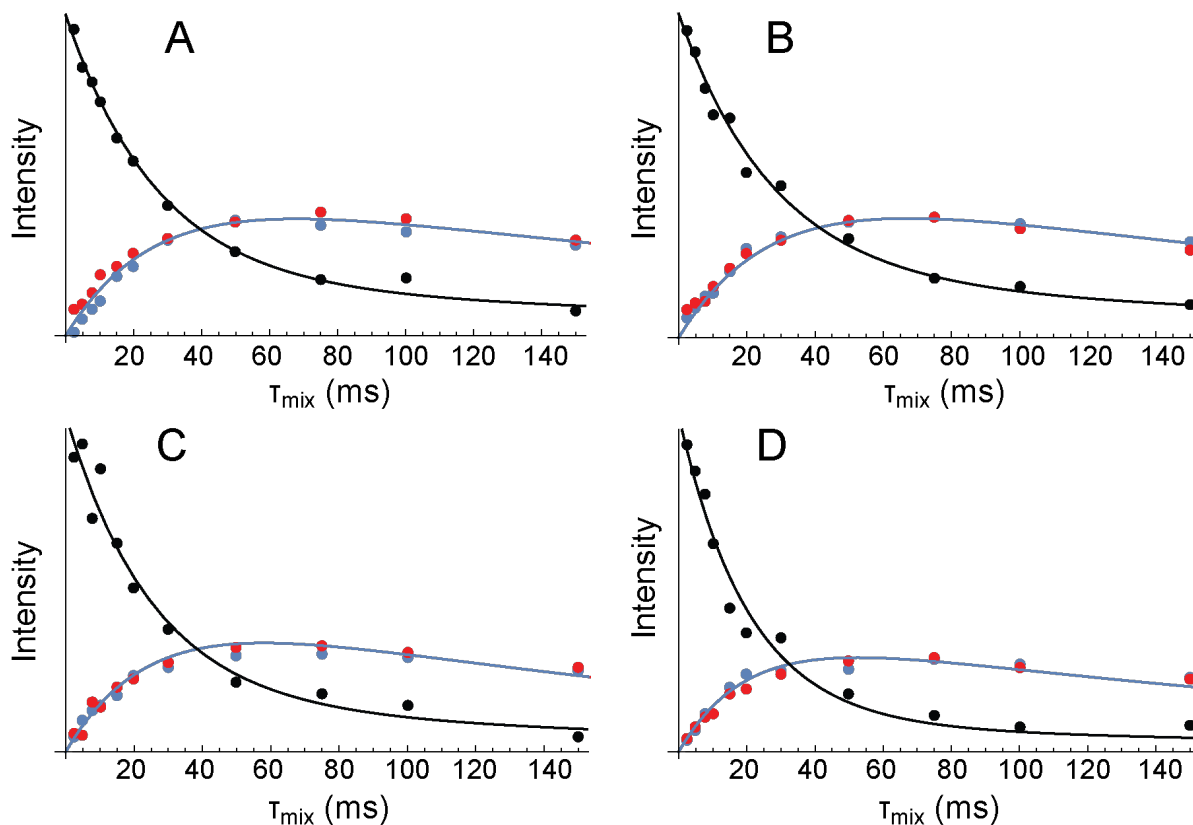

**Figure S13.** The exchange spectroscopy curves for Lys42 signals in Fe(II) PPDME GlnN-A (1.7 mM GlnN-A, 90 mM sodium borate buffer pH 9.3, 10%  $^2\text{H}_2\text{O}$ , 25 °C). Intensities of self and cross peaks are plotted against the longitudinal exchange mixing time. Each panel corresponds to an individual resonance of Lys42: **(A)**  $\text{H}\epsilon$ ,  $-4.8$  ppm; **(B)**  $\text{H}\delta$ ,  $-3.9$  ppm; **(C)**  $\text{H}\epsilon'$ ,  $-2.1$  ppm; **(D)**  $\text{H}\delta'$ ,  $-1.9$  ppm. Black: diagonal peaks in His–Fe–Lys conformation; blue, exchange cross peak from the His–Fe–Lys to the His–Fe–His conformation; red, exchange cross peak from the His–Fe–His conformation to the His–Fe–Lys conformation. The solid lines represent a global fit to the standard equations describing longitudinal exchange. The initial intensities and longitudinal relaxation constants of the His–Fe–His diagonal peaks could not be determined because these peaks are not resolved. The fits were therefore used only to determine the initial intensity of the His–Fe–Lys diagonal peaks and verify the soundness of the data rather than extract parameters. Resolved  $^1\text{H}$  resonances in the 1D spectrum were used to determine the ratio of the two conformations in this sample (see Figure S11). The ratio of exchange peak intensity to initial intensity at short mixing times ( $\tau_{\text{mix}} = 2.5, 5.0, 7.5,$  and  $10.0$  ms) yielded the first-order rate constants of chemical exchange by linear fit. The numbers reported in the text are averages.

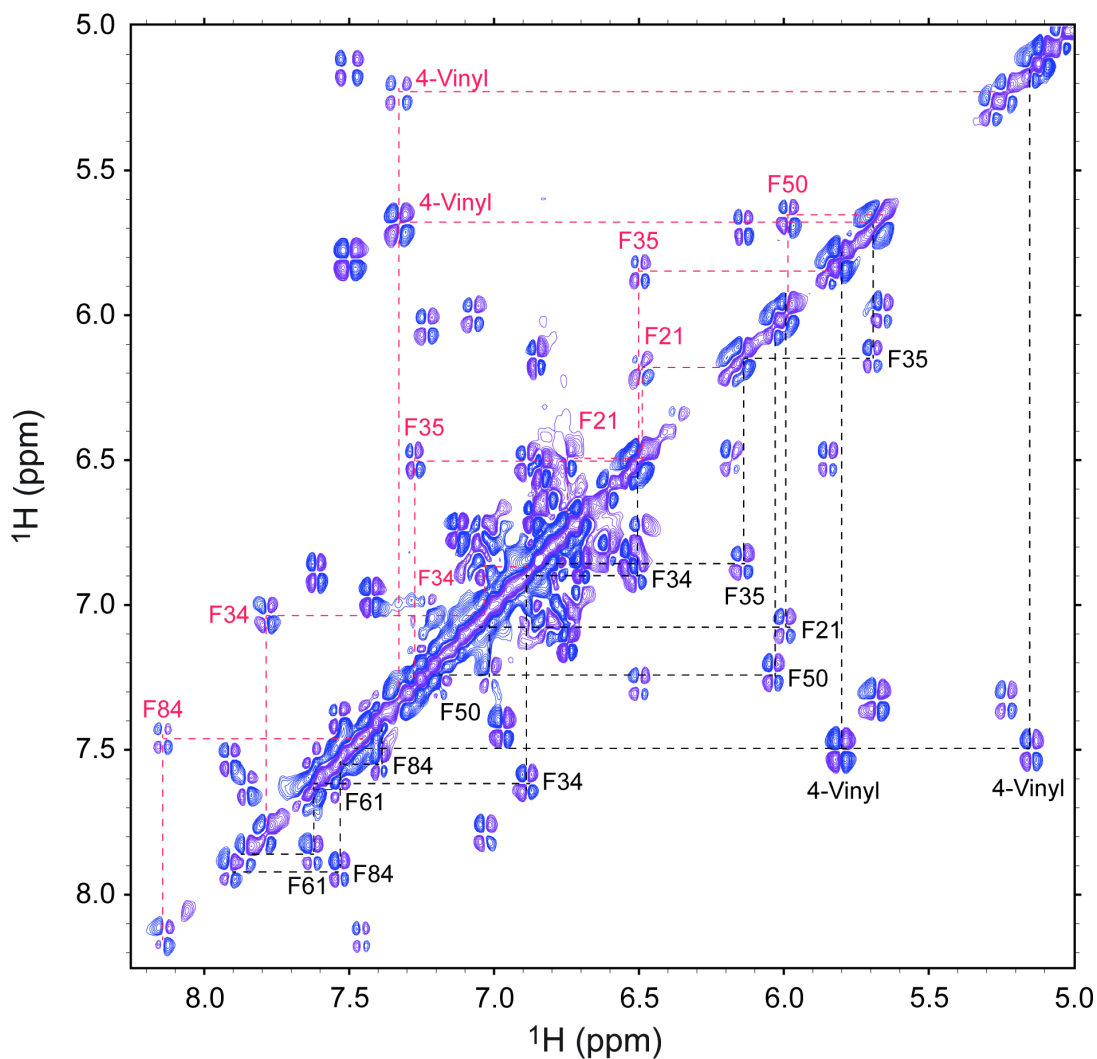

**Figure S14.** Aromatic region of the DQF-COSY spectrum collected on Fe(II) PPDME GlnN-A (1.5 mM GlnN-A, 100 mM sodium borate pH\* 9.7, 99%  $^2\text{H}_2\text{O}$ , 17  $^\circ\text{C}$ ). Assignments for the native conformation are given in black below the diagonal while those for the alkaline conformation are given in red above the diagonal. The dashed lines connect the spin systems:  $\text{H}\delta, \delta'\text{H}$ ,  $\text{H}\epsilon, \epsilon'$  and  $\text{H}\zeta$  of F21, F34, F35, F50, F61, and F84, and the  $\alpha\text{H}$  and  $\beta\text{H}_2$  of the heme 4-vinyl group. The COSY spectrum is free from cross peaks arising from chemical exchange, unlike the  $^1\text{H}$ - $^1\text{H}$  NOESY and TOCSY spectra. Chemical shifts are listed in Table S2.



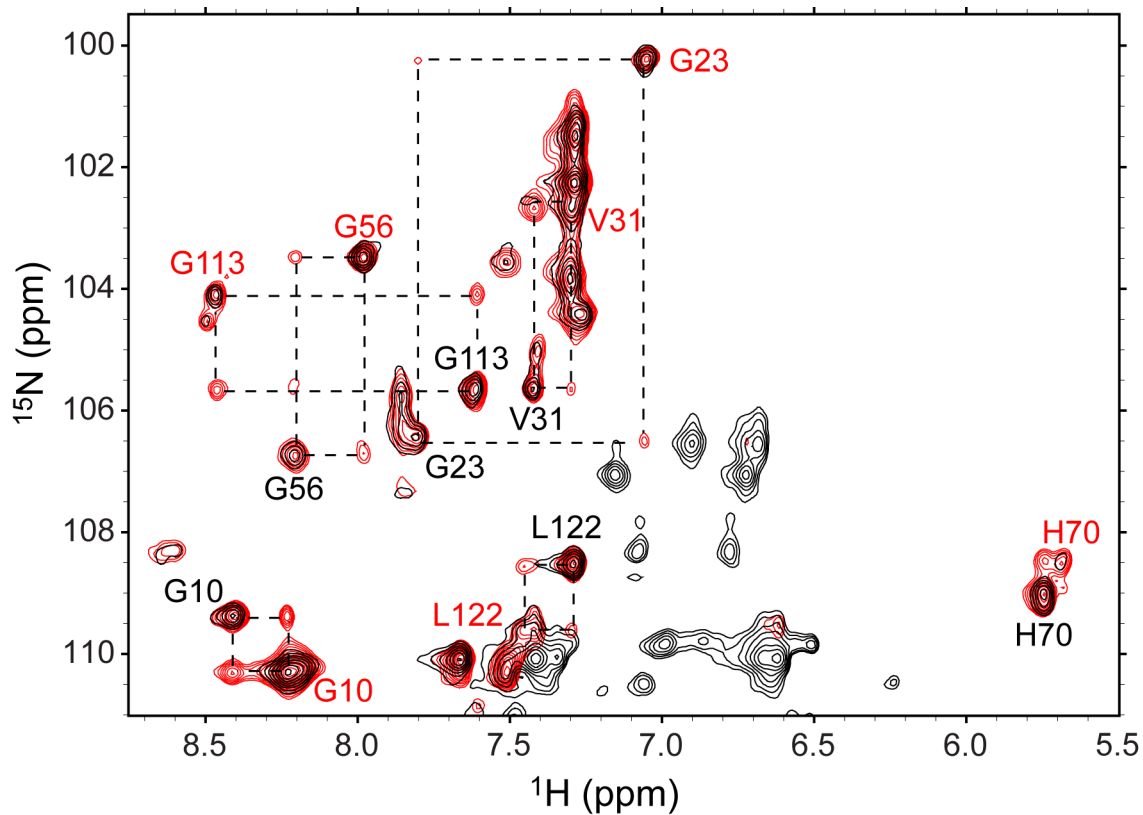

**Figure S15.** The glycine region of the  $^1\text{H}$ - $^{15}\text{N}$  HSQC (black) and  $^1\text{H}$ - $\text{N}_z$ - $^{15}\text{N}$  ZZ exchange (red,  $\tau_{\text{mix}} = 50$  ms) spectra of Fe(II) PPDME GlnN-A (0.5 mM GlnN-A, 90 mM sodium borate buffer pH 9.8, 10%  $^2\text{H}_2\text{O}$ , 25  $^\circ\text{C}$ ). Dashed lines connect exchange correlated peaks with His-Fe-His assignments in black font and His-Fe-Lys assignments in red font.

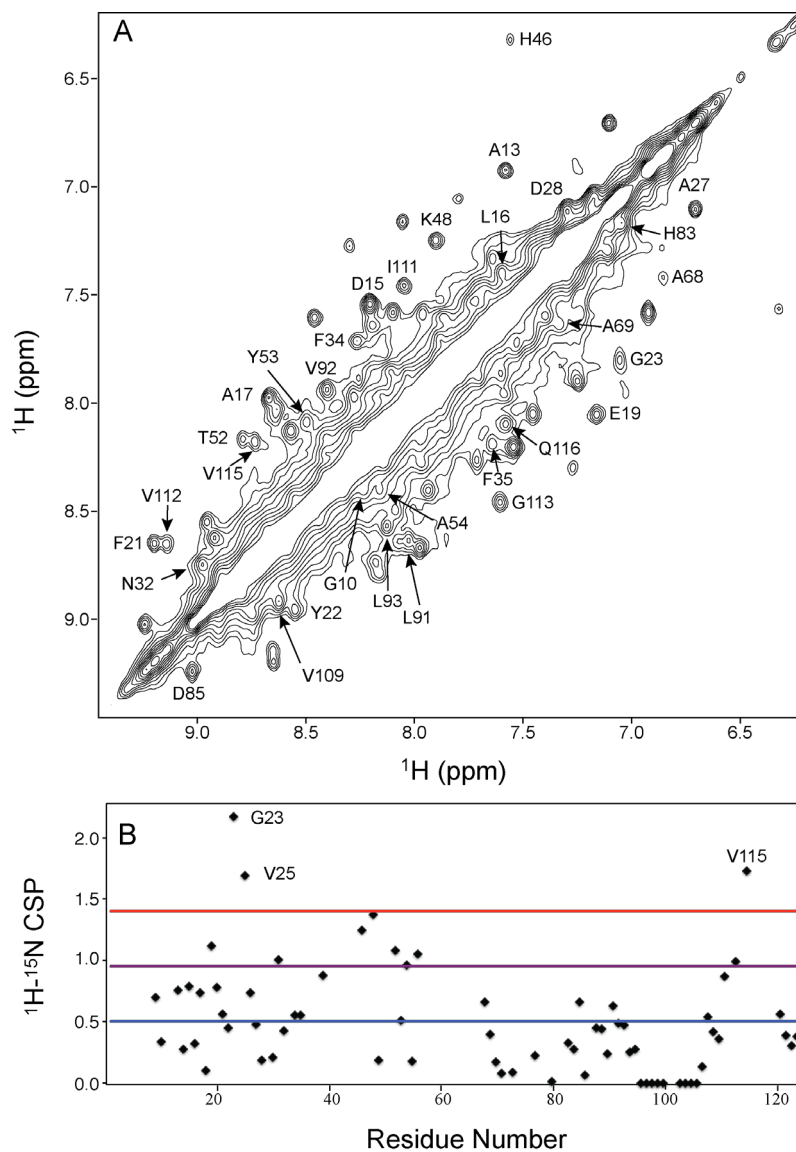

**Figure S16.** Chemical shift difference between the His–Fe–His and His–Fe–Lys conformations of Fe(II) PPDME GlnN-A. **(A)** The  $^1\text{H}$ - $^{15}\text{N}_z$ - $^1\text{H}$  ZZ exchange spectrum of Fe(II) PPDME GlnN-A (0.5 mM GlnN-A, 100 mM sodium borate buffer, pH 9.8, 10%  $^2\text{H}_2\text{O}$ , 25 °C). Resolved peaks are labeled according to assignments determined by  $^1\text{H}$ - $^{15}\text{N}$ - $^1\text{H}$  NOESY-HSQC on the same sample and transferred from published His–Fe–His assignments at pH 7.2.<sup>2</sup> **(B)** A plot of the CSP determined for the 70 amides that could be assigned in both conformations. Lines are drawn to represent the average (blue) and standard deviation (purple for +1 SD, red for +2 SD) of the CSPs. See also Figure 8.

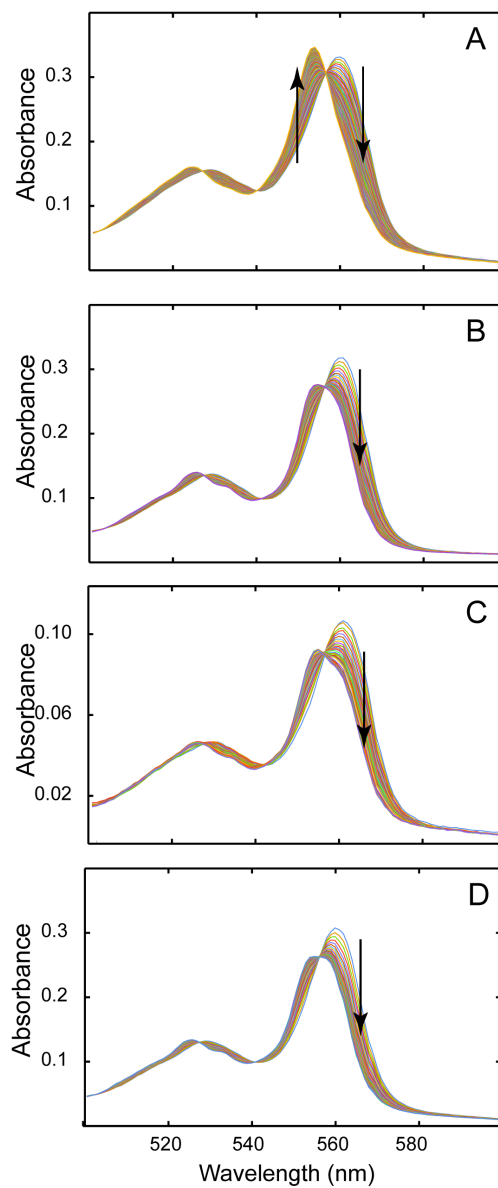

**Figure S17.** Formation, monitored by electronic absorption, of the heme–His117 crosslink in PPDME G1bN (**A**), PP G1bN (**B**), PPDME K42L G1bN (**C**), and PP K42L G1bN (**D**) in 100 mM sodium borate buffer pH 9.2. The black arrows denote the time progression.

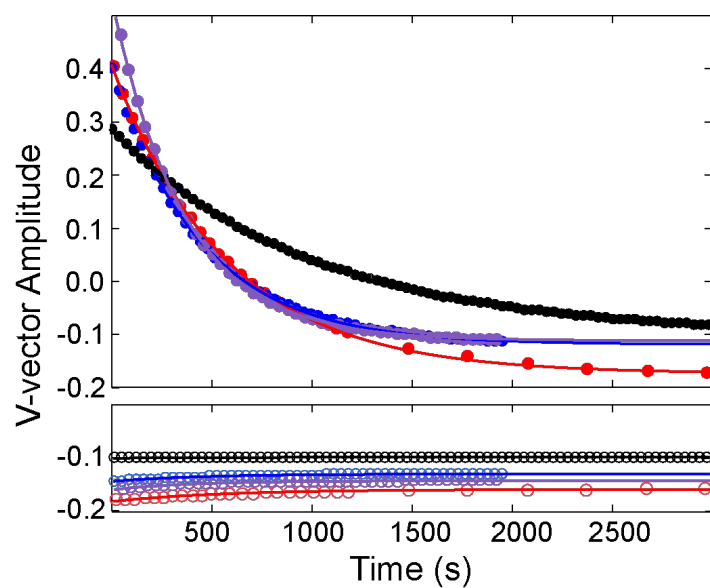

**Figure S18.** Kinetics of PTM in PP G1bN (blue), PPDME G1bN (black), PP K42L G1bN (purple) and PPDME K42L G1bN (red). The first (open circles) and second (closed circles) V-vectors from the SVD analysis of optical data (Figure S17) are shown. For each protein, the solid lines represent a global fit to a single exponential. The V-vectors are shown separately and the second vector for PPDME G1bN has been inverted for ease of comparison.

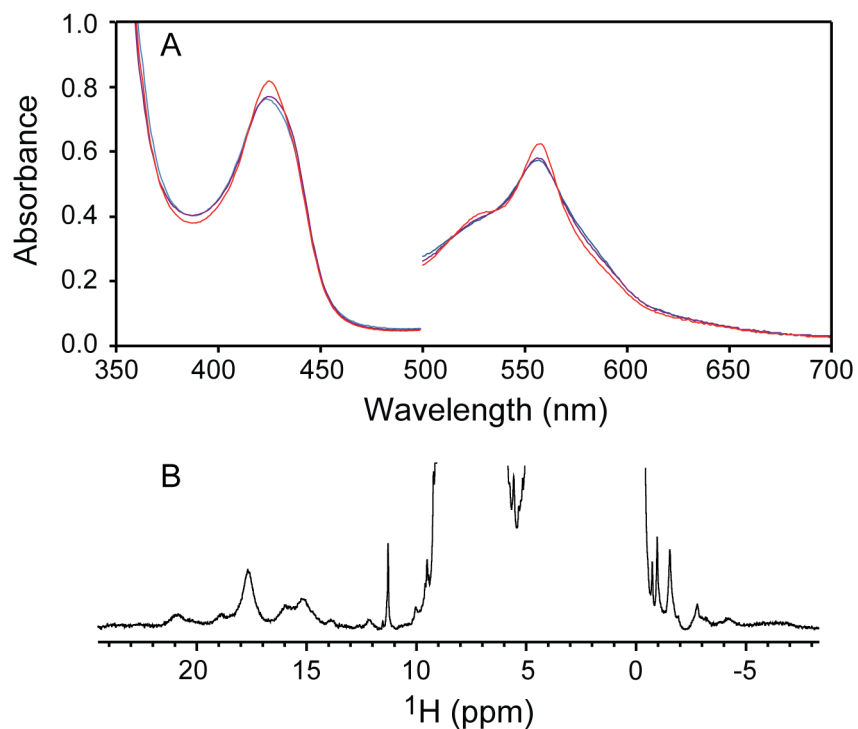

**Figure S19.** Optical and NMR spectra of Fe(II) PP H46L Gln. **(A)** The absorbance spectra of Fe(II) PP H46L Gln at pH 7.3 (blue, 100 mM potassium phosphate buffer) pH 9.3 (purple, 100 mM sodium borate buffer) and pH 10.9 (red, 100 mM sodium (bi)carbonate buffer). **(B)** The  $^1\text{H}$  NMR spectrum of Fe(II) PP H46L Gln ( $\sim 0.3$  mM Gln, 90 mM sodium borate buffer pH 9.5, 10%  $^2\text{H}_2\text{O}$ , 25  $^\circ\text{C}$ ) supporting that the protein is primarily in a high-spin pentacoordinate state at this pH.

**Table S1.** Heme and select side chain <sup>1</sup>H assignments in Fe(III) PPDME Gln and comparison to Fe(III) PP Gln

|                                                                                 | PPDME Gln <sup>1</sup>                    | PP Gln <sup>2</sup>                       |
|---------------------------------------------------------------------------------|-------------------------------------------|-------------------------------------------|
| Heme 1-methyl                                                                   | 16.93                                     | 16.52                                     |
| Heme 3-methyl                                                                   | 7.45                                      | 7.51                                      |
| Heme 5-methyl                                                                   | 22.76                                     | 24.27                                     |
| Heme 8-methyl                                                                   | 8.99                                      | 9.70                                      |
| Heme 2-vinyl ( $\alpha$ , $\beta_{cis}$ , $\beta_{trans}$ )                     | 17.24, -6.16, -5.67                       | 16.45, -5.80, -5.31                       |
| Heme 4-vinyl ( $\alpha$ , $\beta_{cis}$ , $\beta_{trans}$ )                     | 5.34, -1.91, -1.61                        | 5.46, -1.96, -1.67                        |
| Heme 6-substituent ( $\alpha$ , $\alpha'$ , $\beta$ , $\beta'$ , $\epsilon$ )   | 10.97, 10.24, 2.11, 1.86,<br>N.D.         | 11.22, 8.62, 1.24, 0.52,<br>N.A.          |
| Heme 7-substituent ( $\alpha$ , $\alpha'$ , $\beta$ , $\beta'$ , $\epsilon$ )   | 2.72, 1.45, -0.26, -0.51,<br>0.04         | 2.15, 1.57, -0.78, -1.22,<br>N.A.         |
| Heme $\delta$ -meso                                                             | -0.02                                     | 0.09                                      |
| Phe21 ( $\delta\delta'$ , $\epsilon\epsilon'$ , $\zeta$ )                       | 7.34, 7.81, 6.70                          | 7.39, 7.83, 6.72                          |
| Val25 ( $\alpha$ , $\beta$ , $\gamma_1$ , $\gamma_2$ )                          | 3.24, 1.97, 0.56, 0.41                    | 3.29, 2.05, 0.66, 0.56                    |
| Phe34 ( $\delta\delta'$ , $\epsilon\epsilon'$ , $\zeta$ )                       | 6.37, 6.12, 5.85                          | 6.35, 6.11, 5.74                          |
| Phe35 ( $\delta\delta'$ , $\epsilon\epsilon'$ , $\zeta$ )                       | 7.68, 8.34, 6.12                          | 7.84, 8.76, 6.97                          |
| His46 ( $\alpha$ , $\beta$ , $\beta'$ , $\delta_1$ )                            | 7.85, 10.44, 9.11, 12.74                  | 7.99, 10.81, 9.23, 12.93                  |
| Phe50 ( $\delta\delta'$ , $\epsilon\epsilon'$ , $\zeta$ )                       | 5.38, 5.56, 5.91                          | 5.29, 5.54, 5.91                          |
| Phe61 ( $\delta\delta'$ , $\epsilon\epsilon'$ , $\zeta$ )                       | 6.52, 6.46, 6.83                          | 6.45, 6.35, 6.69                          |
| Ala69 ( $\alpha$ , $\beta$ )                                                    | 3.82, 0.06                                | 3.94, 0.31                                |
| His70 ( $\alpha$ , $\beta$ , $\beta'$ , $\delta_1$ )                            | 7.53, 10.36, 9.20, 15.29                  | 7.50, 10.44, 9.26, 15.75                  |
| Leu73 ( $\alpha$ , $\gamma$ , $\delta_1$ , $\delta_2$ )                         | 4.16, 1.96, 0.41, -0.21                   | 4.08, 1.84, -0.68, 0.25                   |
| Leu79 ( $\gamma$ , $\delta_1$ , $\delta_2$ )                                    | 0.87, -1.15, 0.44                         | 0.80, -1.28, 0.29                         |
| Phe84 ( $\delta\delta'$ , $\epsilon\epsilon'$ , $\zeta$ )                       | 6.48, 7.00, 6.86                          | 6.52, 7.06, 6.94                          |
| Ile87 ( $\alpha$ , $\beta$ , $\gamma_1$ , $\gamma_1'$ , $\gamma_2$ , $\delta$ ) | 3.13, 0.22, -0.01, -0.05,<br>-0.98, -1.05 | 3.16, 0.22, -0.01, -0.03,<br>-0.97, -0.97 |
| Val121 ( $\alpha$ , $\beta$ , $\gamma_1$ , $\gamma_2$ )                         | 6.85, 3.07, 3.21, 2.66                    | 6.93, 3.14, 3.31, 2.76                    |

N.D., not determined; N.A., not applicable

<sup>1</sup>25 mM potassium phosphate buffer pH 7.2, 10% <sup>2</sup>H<sub>2</sub>O, 25 °C.

<sup>2</sup>Based on published assignments.<sup>1</sup>

**Table S2.** Heme and select side chain  $^1\text{H}$  assignments in Fe(II) PPDME G1bN-A<sup>1</sup>

|                                                                                                                            | His-Fe-His state                                                 | His-Fe-Lys state                                                                     |
|----------------------------------------------------------------------------------------------------------------------------|------------------------------------------------------------------|--------------------------------------------------------------------------------------|
| Heme 1-methyl                                                                                                              | 2.55                                                             | 3.14                                                                                 |
| Heme 3-methyl                                                                                                              | 3.27                                                             | 3.31                                                                                 |
| Heme 5-methyl                                                                                                              | 2.63                                                             | 3.48                                                                                 |
| Heme 8-methyl                                                                                                              | 3.54                                                             | 2.89                                                                                 |
| Heme 2-ethyl ( $\alpha$ , $\beta$ )                                                                                        | 6.34, 0.98                                                       | 6.73, 2.53                                                                           |
| Heme 4-vinyl ( $\alpha$ , $\beta_{\text{cis}}$ , $\beta_{\text{trans}}$ )                                                  | 7.50, 5.15, 5.81                                                 | 7.33, 5.23, 5.69                                                                     |
| Heme $\alpha$ -meso                                                                                                        | 8.87                                                             | 8.92                                                                                 |
| Heme $\beta$ -meso                                                                                                         | 8.68                                                             | 9.10                                                                                 |
| Heme $\gamma$ -meso                                                                                                        | 9.10                                                             | 8.69                                                                                 |
| Heme $\delta$ -meso                                                                                                        | 8.91                                                             | 9.22                                                                                 |
| Phe21 ( $\delta\delta'$ , $\epsilon\epsilon'$ , $\zeta$ )                                                                  | 6.83, 7.07, 6.00                                                 | 6.75, 6.50, 6.19                                                                     |
| Val25 ( $\alpha$ , $\beta$ , $\gamma_1$ , $\gamma_2$ )                                                                     | 3.13, 1.30, -0.03, 0.15                                          | 3.39, 0.94, -0.77, -0.48                                                             |
| Phe34 ( $\delta\delta'$ , $\epsilon\epsilon'$ , $\zeta$ )                                                                  | 7.62, 6.89, 6.51                                                 | 7.78, 7.03, 6.87                                                                     |
| Phe35 ( $\delta\delta'$ , $\epsilon\epsilon'$ , $\zeta$ )                                                                  | 6.86, 6.14, 5.69                                                 | 7.27, 6.50, 5.85                                                                     |
| Lys42 ( $\alpha$ , $\beta$ , $\beta'$ , $\gamma$ , $\gamma'$ , $\delta$ , $\delta'$ , $\epsilon$ , $\epsilon'$ , $\zeta$ ) | N.D., N.D., N.D., N.D.,<br>N.D., 1.80, 1.80, 3.13,<br>3.13, N.D. | 4.44, 0.47, 1.06, -0.82,<br>-0.25, -3.82, -1.81, -4.78,<br>-2.44, -8.75 <sup>2</sup> |
| His46 ( $\delta_2$ , $\epsilon_1$ )                                                                                        | 0.55, 1.59                                                       | 7.65, 8.12                                                                           |
| Phe50 ( $\delta\delta'$ , $\epsilon\epsilon'$ , $\zeta$ )                                                                  | 6.04, 7.23, 7.02                                                 | 5.66, 5.67, 5.99                                                                     |
| Phe84 ( $\delta\delta'$ , $\epsilon\epsilon'$ , $\zeta$ )                                                                  | 7.40, 7.53, 7.91                                                 | 7.40, 7.46, 8.15                                                                     |
| His117 ( $\delta_2$ , $\epsilon_1$ )                                                                                       | 7.04, 7.00                                                       | 8.49, 7.60                                                                           |
| Val121 ( $\alpha$ , $\beta$ , $\gamma_1$ , $\gamma_2$ )                                                                    | 1.80, 1.20, -0.96, -0.93                                         | 1.84, 1.19, -0.70, -0.62                                                             |

N.D., not determined

<sup>1</sup>99% <sup>2</sup>H<sub>2</sub>O, pH\* 9.7, 17 °C.<sup>2</sup>10% <sup>2</sup>H<sub>2</sub>O, pH 9.7, 17 °C.

**Table S3.** Occupancy of selected sites in 341 Gln relatives (see Materials and Methods)

| Residue and position    | number | percentage |
|-------------------------|--------|------------|
| His at 46               | 173    | 51%        |
| Lys at 46               | 79     | 23%        |
| Lys at 42               | 104    | 31%        |
| Arg at 42               | 120    | 35%        |
| His at 46 and Lys at 42 | 60     | 18%        |



## pH Titration Analysis

We follow an approach similar to that of Nelson and Bowler (2000)<sup>5</sup> with two modifications. We consider the ionization of the lysine as opposed to a “trigger group” and we include the 5c species to allow for weak distal ligation as occasionally observed in hemoglobins.

|          |                                                                 |
|----------|-----------------------------------------------------------------|
| $HH K$   | His–Fe–His complex with neutral lysine                          |
| $HH K^+$ | His–Fe–His complex with charged lysine                          |
| $HK H$   | His–Fe–Lys complex with neutral histidine                       |
| $H HK$   | His–Fe complex with neutral distal histidine and lysine         |
| $H HK^+$ | His–Fe complex with neutral distal histidine and charged lysine |

$$\begin{aligned}
 HH|K &\rightleftharpoons H|HK & K_1 &= \frac{[H|HK]}{[HH|K]} \\
 HK|H &\rightleftharpoons H|HK & K_2 &= \frac{[H|HK]}{[HK|H]} \\
 HH|K^+ &\rightleftharpoons HH|K + H^+ & K_3 &= \frac{[HH|K][H^+]}{[HH|K^+]} \\
 H|HK^+ &\rightleftharpoons H|HK + H^+ & K_3 &= \frac{[H|HK][H^+]}{[H|HK^+]} \\
 & & \frac{K_1}{K_2} &= \frac{[HK|H]}{[HH|K]}
 \end{aligned}$$

where we assumed that the ionization of the lysine is independent of histidine coordination.

$$\begin{aligned}
 Q &= \frac{1}{[HK|H]} ([HK|H] + [H|HK] + [HH|K] + [HH|K^+] + [H|HK^+]) \\
 &= 1 + K_2 + \frac{K_2}{K_1} + \frac{K_2}{K_1} \frac{[H^+]}{K_3} + \frac{K_2[H^+]}{K_3} \\
 f_{HK|H} &= \frac{1}{Q} \\
 f_{HH|K} &= \frac{1}{Q} \frac{K_2}{K_1} \\
 f_{H|HK} &= \frac{1}{Q} K_2 \\
 f_{HH|K^+} &= \frac{1}{Q} \frac{K_2}{K_1} \frac{[H^+]}{K_3} \\
 f_{H|HK^+} &= \frac{1}{Q} \frac{K_2[H^+]}{K_3}
 \end{aligned}$$

As an approximation, the  $[H|HK]$  and  $[H|HK^+]$  terms are ignored.  $HH|K^+$  is spectroscopically indistinguishable from  $HH|K$ . Thus, at each pH value the observables report on  $[HH|K^+] + [HH|K]$  and  $[HK|H]$ .

The apparent midpoint of the transition occurs when

$$\begin{aligned}
 [HH|K^+] &= [HK|H] + [HH|K] \\
 f_{HH|K^+} &= f_{HK|H} + f_{HH|K} \\
 \frac{K_2}{K_1} \frac{[H^+]_{1/2}}{K_3} &= 1 + \frac{K_2}{K_1}
 \end{aligned}$$

$$\begin{aligned}
 [H^+]_{1/2} &= \frac{K_1 K_3}{K_2} + \frac{K_1 K_3 K_2}{K_1 K_2} \\
 &= \left( \frac{K_1}{K_2} + 1 \right) K_3
 \end{aligned}$$

and

$$pK(\text{app}) = -\log[H^+]_{1/2}$$

## References

- (1) Scott, N. L., Falzone, C. J., Vuletich, D. A., Zhao, J., Bryant, D. A., and Lecomte, J. T. J. (2002) The hemoglobin of the cyanobacterium *Synechococcus* sp. PCC 7002: Evidence for hexacoordination and covalent adduct formation in the ferric recombinant protein. *Biochemistry* 41, 6902-6910.
- (2) Pond, M. P., Majumdar, A., and Lecomte, J. T. J. (2012) Influence of heme post-translational modification and distal ligation on the backbone dynamics of a monomeric hemoglobin. *Biochemistry* 51, 5733-5747.
- (3) Vuletich, D. A., Falzone, C. J., and Lecomte, J. T. J. (2006) Structural and dynamic repercussions of heme binding and heme-protein cross-linking in *Synechococcus* sp. PCC 7002 hemoglobin. *Biochemistry* 45, 14075-14084.
- (4) Tsuda, M., Shirotani, I., Minomura, S., and Terayama, Y. (1976) Effect of pressure on dissociation of weak acids in aqueous buffers. *B. Chem. Soc. Jpn.* 49, 2952-2955.
- (5) Nelson, C. J., and Bowler, B. E. (2000) pH dependence of formation of a partially unfolded state of a Lys 73 -> His variant of iso-1-cytochrome *c*: Implications for the alkaline conformational transition of cytochrome *c*. *Biochemistry* 39, 13584-13594.
